# Supplementary material for: PD-L1 Inhibitors as Monotherapy for the First-Line Treatment of Non-Small-Cell Lung Cancer in PD-L1 Positive Patients: A Safety Data Network Meta-Analysis
Source: MDPI journal article supplement (doi:10.3390/jcm10194583), 2021-10-04
Supplement: s1 [file s1]

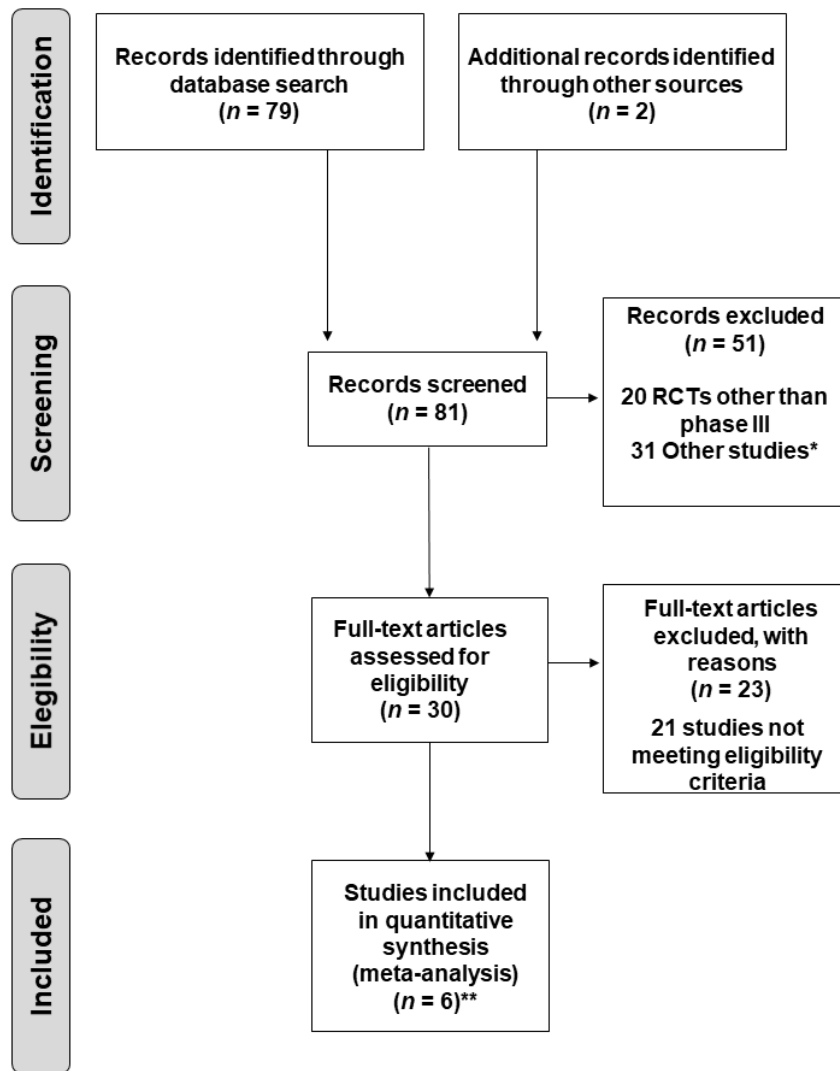

**Figure S1.** Flow chart of study selection [8]. RCTs = randomized controlled trials \* Other studies included pooled analyses, post-marketing studies, clinical trial protocols, patient-reported outcome assessments and any study on biomarkers/gene profiling. \*\* Updates published for the clinical trials KEYNOTE-024 [19,39,41] and KEYNOTE-042 [18,42] were considered in the analysis.

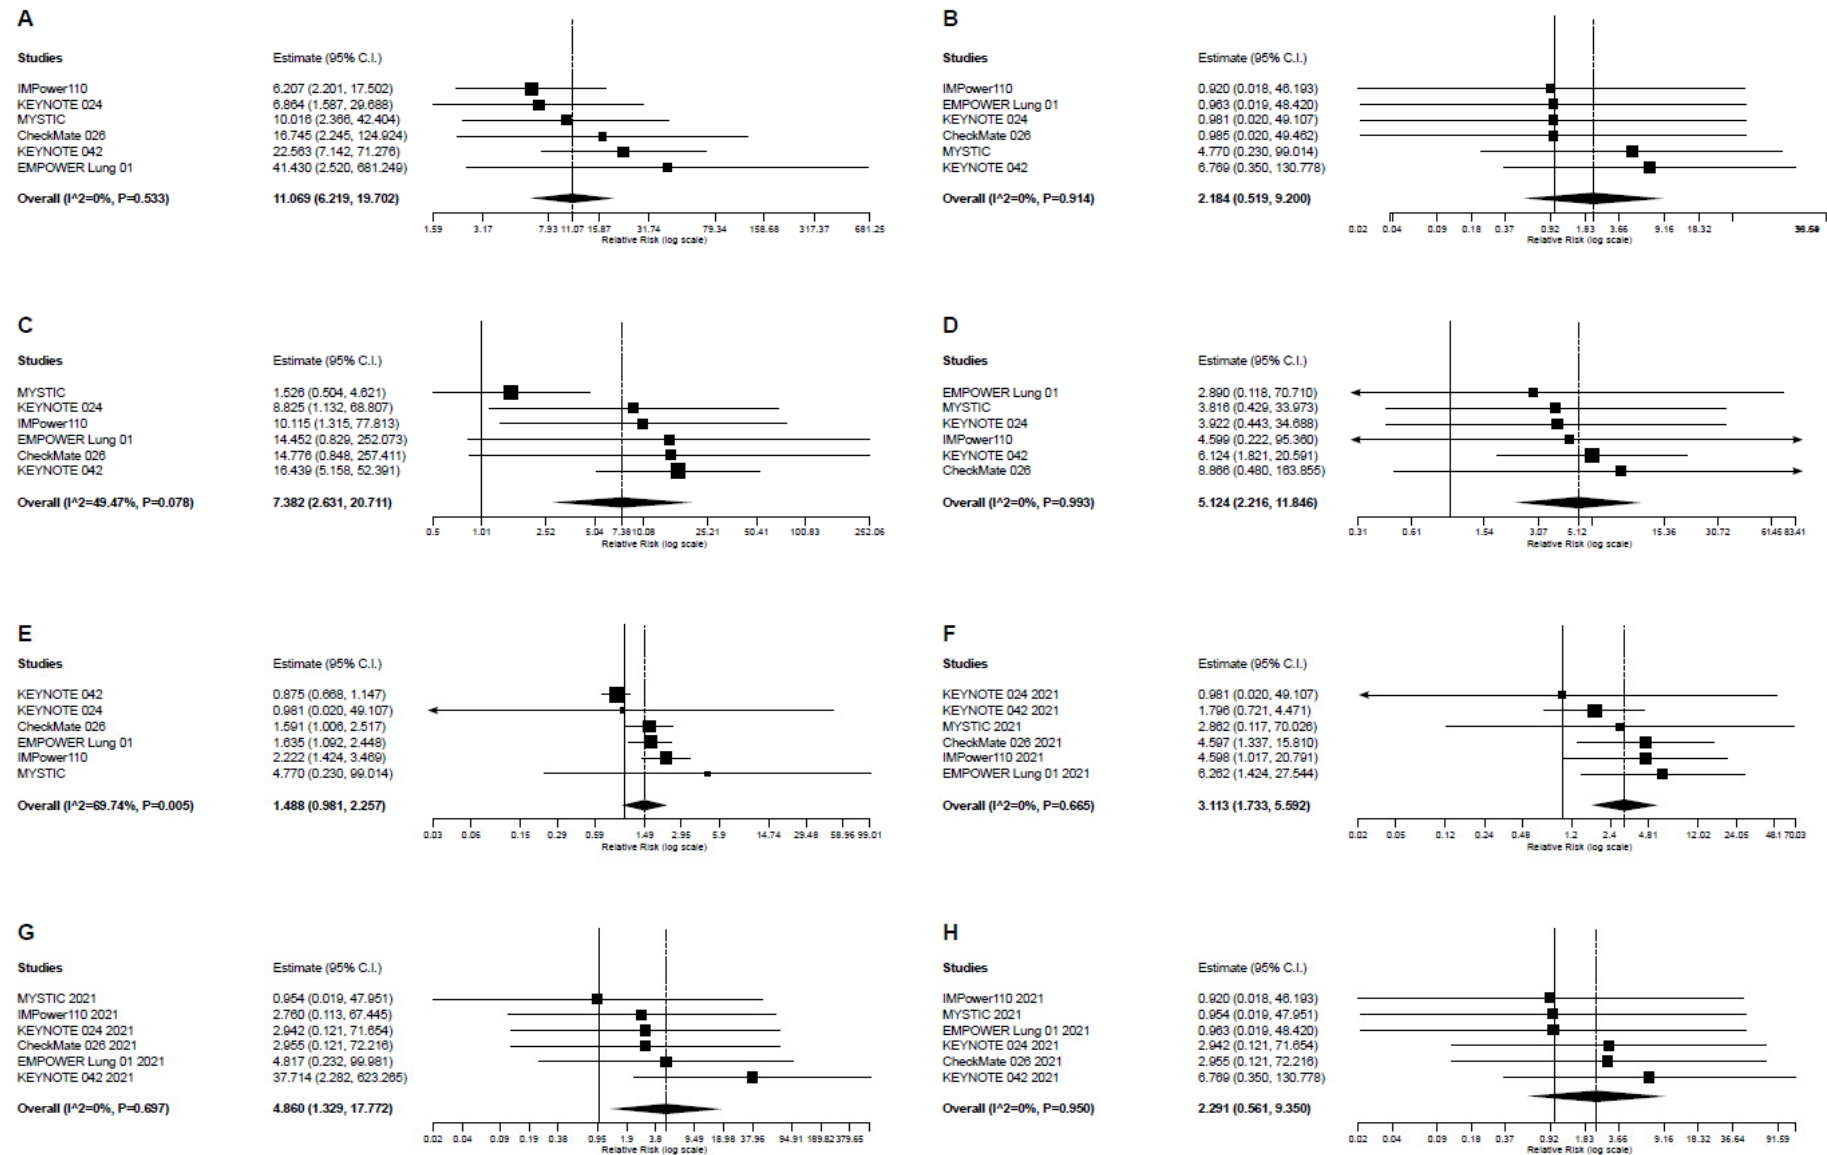

**Figure S2.** Forest plot of pooled risk ratios (RR) for clinically relevant irAEs in patients who received antiPD-1 or antiPD-L1 immunotherapy compared to platinum-based chemotherapy alone. (A) hypothyroidism any grade; (B) hypothyroidism grade 3-4 (C) pneumonitis any grade; (D) pneumonitis grade 3-4; (E) transaminases increased any grade; (F) transaminases increased grade 3-4; (G) nephritis any grade; and (H) nephritis grade 3-4. Estimate, RR; CI, confidence interval.

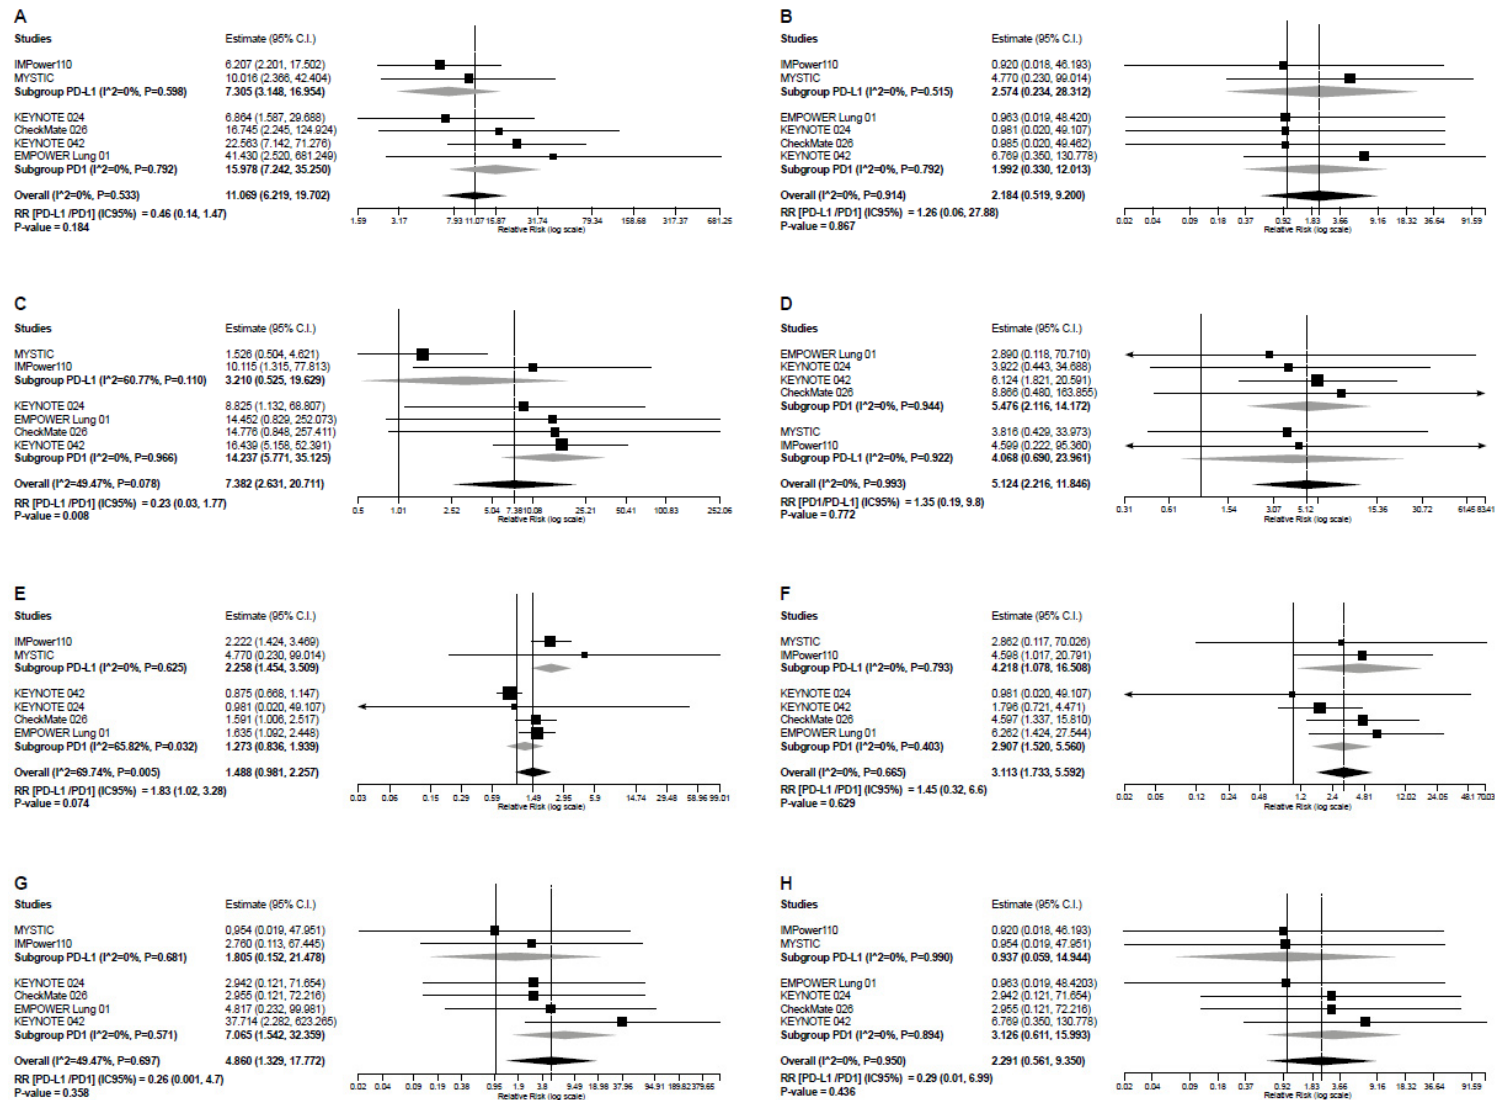

**Figure S3.** Forest plots of pooled risk ratios (RR) for clinically relevant irAEs in the subgroup analysis (antiPD-L1 versus PD-1 inhibitors) (A) hypothyroidism any grade; (B) hypothyroidism grade 3-4 (C) pneumonitis any grade; (D) pneumonitis grade 3-4; (E) transaminases increased any grade; (F) transaminases increased grade 3-4; (G) nephritis any grade; and (H) nephritis grade 3-4. Estimate, RR; CI, confidence interval.

**Table S1.** League table showing the RRs and CI 95% for hypothyroidism any grade between immunotherapy treatments.

|                        | <b>KEYNOTE-024</b> | <b>KEYNOTE-042</b> | <b>CheckMate-026</b> | <b>IMPower110</b> | <b>MYSTIC</b> | <b>EMPOWER Lung-01</b> |
|------------------------|--------------------|--------------------|----------------------|-------------------|---------------|------------------------|
| <b>KEYNOTE-024</b>     |                    | 3,29               | 2,44                 | 0,90              | 1,46          | 6,04                   |
| Lower limit            |                    | 0,51               | 0,20                 | 0,11              | 0,19          | 0,26                   |
| Upper limit            |                    | 21,16              | 29,32                | 7,64              | 11,40         | 142,21                 |
| <b>KEYNOTE-042</b>     | 0,30               |                    | 0,74                 | 0,28              | 0,44          | 1,84                   |
| Lower limit            | 0,05               |                    | 0,07                 | 0,06              | 0,04          | 0,09                   |
| Upper limit            | 1,96               |                    | 7,52                 | 1,29              | 4,58          | 37,88                  |
| <b>CheckMate-026</b>   | 0,41               | 1,35               |                      | 0,37              | 0,60          | 2,47                   |
| Lower limit            | 0,03               | 0,13               |                      | 0,04              | 0,05          | 0,05                   |
| Upper limit            | 4,93               | 13,65              |                      | 3,56              | 7,10          | 134,10                 |
| <b>IMPower110</b>      | 1,11               | 3,64               | 2,70                 |                   | 1,61          | 6,67                   |
| Lower limit            | 0,13               | 0,77               | 0,28                 |                   | 0,27          | 0,34                   |
| Upper limit            | 9,34               | 17,10              | 25,88                |                   | 9,54          | 132,14                 |
| <b>MYSTIC</b>          | 0,69               | 2,25               | 1,67                 | 0,62              |               | 4,14                   |
| Lower limit            | 0,09               | 0,22               | 0,14                 | 0,10              |               | 0,18                   |
| Upper limit            | 5,35               | 23,24              | 19,84                | 3,66              |               | 96,50                  |
| <b>EMPOWER-Lung 01</b> | 0,17               | 0,54               | 0,40                 | 0,15              | 0,24          |                        |
| Lower limit            | 0,01               | 0,03               | 0,01                 | 0,01              | 0,01          |                        |
| Upper limit            | 3,90               | 11,24              | 21,91                | 2,97              | 5,64          |                        |

RR>1 indicates increased risk of AE for the column treatment as compared to the row treatment. Lower and upper limit of the IC95% are shown. All possible indirect comparisons are presented. Statistically significant results are highlighted in blue and underlined.

**Table S2.** League table showing the RRs and CI 95% for hypothyroidism grade 3-4 between immunotherapy treatments.

|                        | <b>KEYNOTE-024</b> | <b>KEYNOTE-042</b> | <b>CheckMate 026</b> | <b>IMPower110</b> | <b>MYSTIC</b> | <b>EMPOWER-Lung 01</b> |
|------------------------|--------------------|--------------------|----------------------|-------------------|---------------|------------------------|
| <b>KEYNOTE-024</b>     |                    | 0,70               | 0,14                 | 0,14              | 0,15          | 0,14                   |
| Lower limit            |                    | 0,01               | 0,00                 | 0,01              | 0,00          | 0,00                   |
| Upper limit            |                    | 48,85              | 18,70                | 2,84              | 19,44         | 19,45                  |
| <b>KEYNOTE-042</b>     | 1,42               |                    | 0,19                 | 0,21              | 0,21          | 0,20                   |
| Lower limit            | 0,02               |                    | 0,00                 | 0,00              | 0,01          | 0,00                   |
| Upper limit            | 98,38              |                    | 27,69                | 28,58             | 4,34          | 28,79                  |
| <b>CheckMate 026</b>   | 7,36               | 5,18               |                      | 1,07              | 1,07          | 1,05                   |
| Lower limit            | 0,05               | 0,04               |                      | 0,00              | 0,00          | 0,02                   |
| Upper limit            | 1012,57            | 744,39             |                      | 270,07            | 271,95        | 54,16                  |
| <b>IMPower110</b>      | 6,90               | 4,86               | 0,94                 |                   | 1,00          | 0,98                   |
| Lower limit            | 0,35               | 0,03               | 0,00                 |                   | 0,00          | 0,00                   |
| Upper limit            | 135,39             | 675,76             | 237,53               |                   | 247,71        | 247,15                 |
| <b>MYSTIC</b>          | 6,87               | 4,84               | 0,93                 | 1,00              |               | 0,98                   |
| Lower limit            | 0,05               | 0,23               | 0,00                 | 0,00              |               | 0,00                   |
| Upper limit            | 918,19             | 101,82             | 237,24               | 245,70            |               | 246,86                 |
| <b>EMPOWER-Lung 01</b> | 7,03               | 4,95               | 0,96                 | 1,02              | 1,02          |                        |
| Lower limit            | 0,05               | 0,03               | 0,02                 | 0,00              | 0,00          |                        |
| Upper limit            | 960,90             | 706,45             | 49,43                | 256,48            | 258,26        |                        |

RR>1 indicates increased risk of AE for the column treatment as compared to the row treatment. Lower and upper limit of the IC95% are shown. All possible indirect comparisons are presented. Statistically significant results are highlighted in blue and underlined.

**Table S3.** League table showing the RRs and CI 95% for pneumonitis any grade between immunotherapy treatments.

|                        | KEYNOTE-024 | KEYNOTE-042  | CheckMate 026 | IMPower110 | MYSTIC      | EMPOWER-Lung 01 |
|------------------------|-------------|--------------|---------------|------------|-------------|-----------------|
| <b>KEYNOTE-024</b>     |             | 1,86         | 1,67          | 1,15       | 0,17        | 1,64            |
| Lower limit            |             | 0,18         | 0,05          | 0,06       | 0,02        | 0,05            |
| Upper limit            |             | 19,69        | 56,52         | 20,72      | 1,78        | 55,30           |
| <b>KEYNOTE-042</b>     | 0,54        |              | 0,90          | 0,62       | <u>0,09</u> | 0,88            |
| Lower limit            | 0,05        |              | 0,04          | 0,06       | <u>0,03</u> | 0,04            |
| Upper limit            | <b>5,67</b> |              | 19,64         | 6,43       | <u>0,30</u> | 19,21           |
| <b>CheckMate 026</b>   | 0,60        | 1,11         |               | 0,68       | 0,10        | 0,98            |
| Lower limit            | 0,02        | 0,05         |               | 0,02       | 0,00        | 0,02            |
| Upper limit            | 20,16       | 24,30        |               | 22,93      | 2,21        | 40,77           |
| <b>IMPower110</b>      | 0,87        | 1,63         | 1,46          |            | 0,15        | 1,43            |
| Lower limit            | 0,05        | 0,16         | 0,04          |            | 0,01        | 0,04            |
| Upper limit            | 15,77       | 16,98        | 48,93         |            | 1,54        | 47,88           |
| <b>MYSTIC</b>          | 5,78        | <u>10,77</u> | 9,68          | 6,63       |             | 9,47            |
| Lower limit            | 0,56        | <u>3,35</u>  | 0,45          | 0,65       |             | 0,44            |
| Upper limit            | 59,64       | <u>34,66</u> | 207,56        | 67,55      |             | 203,11          |
| <b>EMPOWER-Lung 01</b> | 0,61        | 1,14         | 1,02          | 0,70       | 0,11        |                 |
| Lower limit            | 0,02        | 0,05         | 0,02          | 0,02       | 0,00        |                 |
| Upper limit            | 20,62       | 24,86        | 42,61         | 23,45      | 2,26        |                 |

RR>1 indicates increased risk of AE for the column treatment as compared to the row treatment. Lower and upper limit of the IC95% are shown. All possible indirect comparisons are presented. Statistically significant results are highlighted in blue and underlined.

**Table S4.** League table including RR and CI 95% for pneumonitis grade 3-4 between immunotherapy treatments

|                        | <b>KEYNOTE-024</b> | <b>KEYNOTE-042</b> | <b>CheckMate 026</b> | <b>IMPower110</b> | <b>MYSTIC</b> | <b>EMPOWER-Lung 01</b> |
|------------------------|--------------------|--------------------|----------------------|-------------------|---------------|------------------------|
| <b>KEYNOTE-024</b>     |                    | 1,56               | 2,26                 | 1,17              | 0,97          | 0,74                   |
| Lower limit            |                    | 0,13               | 0,06                 | 0,09              | 0,04          | 0,02                   |
| Upper limit            |                    | 18,93              | 86,23                | 14,50             | 21,33         | 35,36                  |
| <b>KEYNOTE-042</b>     | 0,64               |                    | 1,45                 | 0,75              | 0,62          | 0,47                   |
| Lower limit            | 0,05               |                    | 0,06                 | 0,03              | 0,12          | 0,02                   |
| Upper limit            | 7,77               |                    | 34,07                | 19,65             | 3,13          | 14,43                  |
| <b>CheckMate 026</b>   | 0,44               | 0,69               |                      | 0,52              | 0,43          | 0,33                   |
| Lower limit            | 0,01               | 0,03               |                      | 0,01              | 0,01          | 0,02                   |
| Upper limit            | 16,87              | 16,25              |                      | 34,80             | 16,46         | 6,68                   |
| <b>IMPower110</b>      | 0,85               | 1,33               | 1,93                 |                   | 0,83          | 0,63                   |
| Lower limit            | 0,07               | 0,05               | 0,03                 |                   | 0,02          | 0,01                   |
| Upper limit            | 10,54              | 34,85              | 129,34               |                   | 34,82         | 51,51                  |
| <b>MYSTIC</b>          | 1,03               | 1,60               | 2,32                 | 1,21              |               | 0,76                   |
| Lower limit            | 0,05               | 0,32               | 0,06                 | 0,03              |               | 0,02                   |
| Upper limit            | 22,53              | 8,06               | 88,88                | 50,57             |               | 36,44                  |
| <b>EMPOWER-Lung 01</b> | 1,36               | 2,12               | 3,07                 | 1,59              | 1,32          |                        |
| Lower limit            | 0,03               | 0,07               | 0,15                 | 0,02              | 0,03          |                        |
| Upper limit            | 65,13              | 64,81              | 62,90                | 130,44            | 63,54         |                        |

RR>1 indicates increased risk of AE for the column treatment as compared to the row treatment. Lower and upper limit of the IC95% are shown. All possible indirect comparisons are presented. Statistically significant results are highlighted in blue and underlined.

**Table S5.** League table showing the RRs and CI 95% for transaminases increased any grade between immunotherapy treatments.

|                        | KEYNOTE-024 | KEYNOTE-042 | CheckMate 026 | IMPower110  | MYSTIC       | EMPOWER-Lung 01 |
|------------------------|-------------|-------------|---------------|-------------|--------------|-----------------|
| <b>KEYNOTE-024</b>     |             | 0,89        | 1,62          | 2,27        | 4,86         | 1,67            |
| Lower limit            |             | 0,02        | 0,03          | 0,04        | 0,03         | 0,03            |
| Upper limit            |             | 44,16       | 81,72         | 115,08      | 675,76       | 83,47           |
| <b>KEYNOTE-042</b>     | 1,12        |             | <u>1,82</u>   | <u>2,54</u> | <u>5,45</u>  | <u>1,87</u>     |
| Lower limit            | 0,02        |             | <u>1,07</u>   | <u>1,51</u> | <u>1,46</u>  | <u>1,15</u>     |
| Upper limit            | 55,51       |             | <u>3,10</u>   | <u>4,27</u> | <u>20,34</u> | <u>3,04</u>     |
| <b>CheckMate 026</b>   | 0,62        | <u>0,55</u> |               | 1,40        | 3,00         | 1,03            |
| Lower limit            | 0,01        | <u>0,32</u> |               | 0,74        | 0,14         | 0,62            |
| Upper limit            | 31,07       | <u>0,94</u> |               | 2,65        | 64,36        | 1,71            |
| <b>IMPower110</b>      | 0,44        | <u>0,39</u> | 0,72          |             | 2,15         | 0,74            |
| Lower limit            | 0,01        | <u>0,23</u> | 0,38          |             | 0,10         | 0,40            |
| Upper limit            | 22,43       | <u>0,66</u> | 1,36          |             | 45,99        | 1,34            |
| <b>MYSTIC</b>          | 0,21        | <u>0,18</u> | 0,33          | 0,47        |              | 0,34            |
| Lower limit            | 0,00        | <u>0,05</u> | 0,02          | 0,02        |              | 0,02            |
| Upper limit            | 28,58       | <u>0,68</u> | 7,16          | 9,98        |              | 7,30            |
| <b>EMPOWER-Lung 01</b> | 0,60        | <u>0,54</u> | 0,97          | 1,36        | 2,92         |                 |
| Lower limit            | 0,01        | <u>0,33</u> | 0,59          | 0,75        | 0,14         |                 |
| Upper limit            | 30,05       | <u>0,87</u> | 1,62          | 2,48        | 62,15        |                 |

RR>1 indicates increased risk of AE for the column treatment as compared to the row treatment. Lower and upper limit of the IC95% are shown. All possible indirect comparisons are presented. Statistically significant results are highlighted in blue and underlined.



**Table S6.** League table showing RR and CI 95% for transaminases increased grade 3-4 between immunotherapy treatments.

|                        | <b>KEYNOTE-024</b> | <b>KEYNOTE-042</b> | <b>CheckMate 026</b> | <b>IMPower110</b> | <b>MYSTIC</b> | <b>EMPOWER-Lung 01</b> |
|------------------------|--------------------|--------------------|----------------------|-------------------|---------------|------------------------|
| <b>KEYNOTE-024</b>     |                    | 1,83               | 4,69                 | 4,69              | 2,92          | 6,38                   |
| Lower limit            |                    | 0,03               | 0,08                 | 0,08              | 0,02          | 0,10                   |
| Upper limit            |                    | 99,80              | 278,28               | 279,77            | 449,50        | 411,06                 |
| <b>KEYNOTE-042</b>     | 0,55               |                    | 2,56                 | 2,56              | 1,59          | 3,49                   |
| Lower limit            | 0,01               |                    | 0,55                 | 0,44              | 0,48          | 0,61                   |
| Upper limit            | 29,77              |                    | 11,89                | 14,93             | 5,29          | 19,86                  |
| <b>CheckMate 026</b>   | 0,21               | 0,39               |                      | 1,00              | 0,62          | 1,36                   |
| Lower limit            | 0,00               | 0,08               |                      | 0,14              | 0,02          | 0,19                   |
| Upper limit            | 12,67              | 1,81               |                      | 7,03              | 19,17         | 9,97                   |
| <b>IMPower110</b>      | 0,21               | 0,39               | 1,00                 |                   | 0,62          | 1,36                   |
| Lower limit            | 0,00               | 0,07               | 0,14                 |                   | 0,02          | 0,16                   |
| Upper limit            | 12,73              | 2,28               | 7,03                 |                   | 21,35         | 11,28                  |
| <b>MYSTIC</b>          | 0,34               | 0,63               | 1,61                 | 1,61              |               | 2,19                   |
| Lower limit            | 0,00               | 0,19               | 0,05                 | 0,05              |               | 0,06                   |
| Upper limit            | 52,81              | 2,08               | 49,46                | 55,11             |               | 74,18                  |
| <b>EMPOWER-Lung 01</b> | 0,16               | 0,29               | 0,73                 | 0,73              | 0,46          |                        |
| Lower limit            | 0,00               | 0,05               | 0,10                 | 0,09              | 0,01          |                        |
| Upper limit            | 10,09              | 1,63               | 5,37                 | 6,08              | 15,49         |                        |

RR>1 indicates increased risk of AE for the column treatment as compared to the row treatment. Lower and upper limit of the IC95% are shown. All possible indirect comparisons are presented. Statistically significant results are highlighted in blue and underlined.

**Table S7.** League table showing the RRs and CI 95% for nephritis any grade between immunotherapy treatments.

|                        | <b>KEYNOTE-024</b> | <b>KEYNOTE-042</b> | <b>CheckMate 026</b> | <b>IMPower110</b> | <b>MYSTIC</b> | <b>EMPOWER-Lung 01</b> |
|------------------------|--------------------|--------------------|----------------------|-------------------|---------------|------------------------|
| <b>KEYNOTE-024</b>     |                    | 12,82              | 1,00                 | 0,94              | 0,32          | 1,64                   |
| Lower limit            |                    | 0,18               | 0,01                 | 0,04              | 0,00          | 0,02                   |
| Upper limit            |                    | 897,45             | 91,87                | 24,83             | 50,68         | 133,71                 |
| <b>KEYNOTE-042</b>     | 0,08               |                    | 0,08                 | 0,07              | 0,03          | 0,13                   |
| Lower limit            | 0,00               |                    | 0,00                 | 0,00              | 0,00          | 0,00                   |
| Upper limit            | 5,46               |                    | 5,50                 | 5,14              | 0,43          | 7,95                   |
| <b>CheckMate 026</b>   | 1,00               | 12,76              |                      | 0,93              | 0,32          | 1,63                   |
| Lower limit            | 0,01               | 0,18               |                      | 0,01              | 0,00          | 0,05                   |
| Upper limit            | 91,06              | 896,47             |                      | 85,70             | 50,60         | 51,31                  |
| <b>IMPower110</b>      | 1,07               | 13,66              | 1,07                 |                   | 0,35          | 1,75                   |
| Lower limit            | 0,04               | 0,19               | 0,01                 |                   | 0,00          | 0,02                   |
| Upper limit            | 28,22              | 959,90             | 98,24                |                   | 54,18         | 143,00                 |
| <b>MYSTIC</b>          | 3,08               | 39,53              | 3,10                 | 2,89              |               | 5,05                   |
| Lower limit            | 0,02               | 2,35               | 0,02                 | 0,02              |               | 0,04                   |
| Upper limit            | 481,97             | 665,41             | 485,45               | 453,45            |               | 715,31                 |
| <b>EMPOWER-Lung 01</b> | 0,61               | 7,83               | 0,61                 | 0,57              | 0,20          |                        |
| Lower limit            | 0,01               | 0,13               | 0,02                 | 0,01              | 0,00          |                        |
| Upper limit            | 49,88              | 487,47             | 19,31                | 46,95             | 28,06         |                        |

RR>1 indicates increased risk of AE for the column treatment as compared to the row treatment. Lower and upper limit of the IC95% are shown. All possible indirect comparisons are presented. Statistically significant results are highlighted in blue and underlined.

**Table S8.** League table showing the RRs and CI 95% for nephritis increased grade 3-4 between immunotherapy treatments.

|                        | <b>KEYNOTE-024</b> | <b>KEYNOTE-042</b> | <b>CheckMate 026</b> | <b>IMPower110</b> | <b>MYSTIC</b> | <b>EMPOWER-Lung 01</b> |
|------------------------|--------------------|--------------------|----------------------|-------------------|---------------|------------------------|
| <b>KEYNOTE-024</b>     |                    | 2,30               | 1,00                 | 0,31              | 0,32          | 0,33                   |
| Lower limit            |                    | 0,03               | 0,01                 | 0,01              | 0,00          | 0,00                   |
| Upper limit            |                    | 178,98             | 91,87                | 7,76              | 50,68         | 51,53                  |
| <b>KEYNOTE-042</b>     | 0,43               |                    | 0,44                 | 0,14              | 0,14          | 0,14                   |
| Lower limit            | 0,01               |                    | 0,01                 | 0,00              | 0,01          | 0,00                   |
| Upper limit            | 33,81              |                    | 34,07                | 18,70             | 2,77          | 19,45                  |
| <b>CheckMate 026</b>   | 1,00               | 2,29               |                      | 0,31              | 0,32          | 0,33                   |
| Lower limit            | 0,01               | 0,03               |                      | 0,00              | 0,00          | 0,01                   |
| Upper limit            | 91,06              | 178,77             |                      | 49,47             | 50,60         | 8,08                   |
| <b>IMPower110</b>      | 3,20               | 7,36               | 3,21                 |                   | 1,04          | 1,05                   |
| Lower limit            | 0,13               | 0,05               | 0,02                 |                   | 0,00          | 0,00                   |
| Upper limit            | 79,32              | 1012,57            | 510,38               |                   | 267,00        | 271,31                 |
| <b>MYSTIC</b>          | 3,08               | 7,10               | 3,10                 | 0,96              |               | 1,01                   |
| Lower limit            | 0,02               | 0,36               | 0,02                 | 0,00              |               | 0,00                   |
| Upper limit            | 481,97             | 139,62             | 485,45               | 248,31            |               | 258,37                 |
| <b>EMPOWER-Lung 01</b> | 3,06               | 7,03               | 3,07                 | 0,96              | 0,99          |                        |
| Lower limit            | 0,02               | 0,05               | 0,12                 | 0,00              | 0,00          |                        |
| Upper limit            | 480,95             | 960,90             | 76,08                | 247,62            | 253,57        |                        |

RR>1 indicates increased risk of AE for the column treatment as compared to the row treatment. Lower and upper limit of the IC95% are shown. All possible indirect comparisons are presented. Statistically significant results are highlighted in blue and underlined.
